# Supplementary material for: B chromosomes of multiple species have intense evolutionary dynamics and accumulated genes related to important biological processes
Source: PubMed Central journal article supplement (PMC7509943; doi:10.1186/s12864-020-07072-1), 2020-09-23
Supplement: 12864_2020_7072_MOESM2_ESM.pdf [file 12864_2020_7072_MOESM2_ESM.pdf]

## Supplementary Tables

Table S1. De novo genome assemblies and their statistics

| <b>Organism</b>             | <b>LGs/Chr</b> | <b>Unplaced scaffolds</b>    | <b>N50</b> | <b>N75</b> | <b>GC%</b> | <b>Genome size</b> |
|-----------------------------|----------------|------------------------------|------------|------------|------------|--------------------|
| <i>A. mexicanus</i> (B-)    | 25             | 1854                         | 36.3 Mb    | 24.4 Mb    | 37.90      | 1.4 Gb             |
| <i>A. mexicanus</i> (B+)    | 25             | 1920                         | 39.6 Mb    | 26.13 Mb   | 37.93      | 1.6 Gb             |
| <i>A. correntinus</i> (B-)  | 18             | 1861                         | 1617 Mb    | 27.3 Mb    | 37.70      | 2.3 Gb             |
| <i>A. correntinus</i> (B+)  | 18             | 1907                         | 1916 Mb    | 28.1 Mb    | 37.78      | 2.6 Gb             |
| <i>A. flavolineata</i> (B+) | N/A            | 1,727,319 (greater than 1kb) | 3.3 kb     | 1.5 kb     | 41.06      | 6.3 Gb             |

Table S2. List of primers of representative blocks used in qPCR and FISH mapping

| Species               | Block Name                     | Block ID          | Forward primer              | Reverse Primer             | Product size (bp) | Melting temperature  | Primers type |
|-----------------------|--------------------------------|-------------------|-----------------------------|----------------------------|-------------------|----------------------|--------------|
| <i>A. mexicanus</i>   | NC_035906.1_10647615-10648143  | Block-1-FISH      | ACATTTCTGCCTTTTAGTTGGG      | ATGACCAATTCATAGACAAGTGTCAC | 336               | 59.3 (F); 59.6 (R)   | FISH         |
|                       | NC_035906.1_10647615-10648143  | Block-1-qPCR      | ACATTTCTGCCTTTTAGTTGGG      | TCATGTCACGTACACTTCACAGT    | 151               | 59.4 (F); 60 (R)     | qPCR         |
|                       | NC_035913.1_22862787-22865602  | Block-2-FISH      | CCATCAGTCAGCATCCTGTTTC      | GTGGCACCACCTTTAAAATAAGGCT  | 267               | 59.1 (F); 59.8 (R)   | FISH         |
|                       | NC_035913.1_22862787-22865602  | Block-2-qPCR      | CCATCAGTCAGCATCCTGTTTC      | GCGACTAAGCACTTCATAAACACA   | 164               | 59.32 (F); 59.8 (R)  | qPCR         |
|                       | NC_035913.1_22871651-22872613  | Block-3-FISH      | CACACCTATTCACCTCCCTTGGT     | GCAGTACACAAGCAAATGACAAGA   | 329               | 59.7 (F); 60.3 (R)   | FISH         |
|                       | NC_035913.1_22871651-22872613  | Block-3-qPCR      | CACACCTATTCACCTCCCTTGGT     | gtCCTAAGCGTGGTTAAAGTATTACC | 152               | 59.7 (F); 59.7 (R)   | qPCR         |
|                       | NC_035913.1_22873870-22874705  | Block-4-FISH      | AGTTGTTACCTGTTTACCCAACATTAG | ACGAATCATGCACTCTCACCA      | 406               | 59.8 (F); 59.7 (R)   | FISH         |
|                       | NC_035913.1_22873870-22874705  | Block-4-qPCR      | AGTTGTTACCTGTTTACCCAACATTAG | ACATGAGGTAGTACATTAACAACGC  | 180               | 59.8 (F); 59.4 (R)   | qPCR         |
|                       | NC_035913.1_23188499-23195606  | Block-5-FISH      | GGAGGGTAGATGGGGAAGGA        | TCAGTTAGATAGAAGCTGGATGTTGT | 249               | 59.7 (F); 59.8 (f)   | FISH         |
|                       | NC_035913.1_23188499-23195606  | Block-5-qPCR      | GGAGGGTAGATGGGGAAGGA        | AAACCCTGGTCTCTGCCCTA       | 180               | 59.73 (F); 60.18 (R) | qPCR         |
|                       | NW_019170575.1-27717_28646     | Block-6-FISH      | AAGAGGCGATTCTGCGGAA         | CGCCTCTCAAGAACAGCAA        | 536               | 60.0 (F); 60.6 (R)   | FISH         |
|                       | NW_019170575.1-27717_28646     | Block-6-qPCR      | AAGAGGCGATTCTGCGGAA         | ACCCTCGGATGTGGTGATTC       | 205               | 60.0 (F); 59.46 (R)  | qPCR         |
|                       | NW_019170910.1_26677-27858     | Block-7-FISH      | ACAGTTCACCTCAGTCTCAC        | CTTGGGTTCTGTAGCAGGACA      | 537               | 59.3 (F); 59.7 (R)   | FISH         |
|                       | NW_019170910.1_26677-27858     | Block-7-qPCR      | ACAGTTCACCTCAGTCTCAC        | AGACACAGCAGAGCTACGGT       | 157               | 59.3 (F); 60.9 (R)   | qPCR         |
|                       | NW_019171087.1_32674-33258     | Block-8-qPCR/FISH | GGGAATGCTCACAGGCTGA         | ACACGGGTTTGAAAAATACCAACT   | 103               | 59.70 (F); 59.60 (R) | qPCR/FISH    |
|                       | NW_019171959.1_9110-10065      | Block-9-FISH      | ATCGCGGGCAAATGTCCAAT        | GACATAGGTGATACCCGAAAACA    | 323               | 61.0 (F); 60 (R)     | FISH         |
|                       | NW_019171959.1_9110-10065      | Block-9-qPCR      | ATCGCGGGCAAATGTCCAAT        | GGGTCACAGCAGTCATACGG       | 183               | 61.0 (F); 60.5 (R)   | qPCR         |
|                       | NW_019172828.1_4736897-4738479 | Block-10-FISH     | GCGGACATTTCTGCCTTTT         | TCCATAGTGAAACGGCGTGA       | 617               | 59.40 (F); 59.40 (R) | FISH         |
|                       | NW_019172828.1_4736897-4738479 | Block-10-qPCR     | GCGGACATTTCTGCCTTTT         | TGACAGCACAGAGACAATCATCA    | 117               | 59.40 (F); 60.0 (F)  | qPCR         |
|                       | NW_019172877.1_4865-5684       | Block-11-FISH     | gACTTTCAATCCCATGTTTGCCA     | CCCTGAATACCCAGTTTTTCCC     | 493               | 60 (F); 60.5 (R)     | FISH         |
|                       | NW_019172877.1_4865-5684       | Block-11-qPCR     | gACTTTCAATCCCATGTTTGCCA     | aGCACCCCATTCATCATGG        | 173               | 60 (F); 61 (R)       | qPCR         |
| <i>A. correntinus</i> | Gypsy                          | 33-I_DR 498 903   | ACGGACTGGGCTTTCCATTT        | CGTCCGGAACACAAAACGAA       | 406               | 59.3 (F)<br>59.6 (R) | FISH         |
|                       | Tc-Mariner                     | DR 723 1024       | GCTGCTCGAGGTCTAGTGTG        | TTGGTACTTTTGGCAGTGTGG      | 252               | 59.4 (F)<br>60 (R)   | FISH         |

|                        |                           |          |                          |                        |     |                |      |
|------------------------|---------------------------|----------|--------------------------|------------------------|-----|----------------|------|
| <i>A. flavolineata</i> | Scaffold2635:1157-2411    | Block 1  | TCGCATAGGGAATTGTGGGT     | CTTCTCTACGCCTGGGACAC   | 507 | 59.08<br>59.83 | FISH |
|                        | Scaffold122200:629-1783   | Block 2  | CGCCATTGTTTGTCCGACTC     | ATGGGTGGACTTTGTTTCGCT  | 539 | 59.83<br>59.89 | FISH |
|                        | Scaffold171457:539-1028   | Block 3  | GCTCCAAATTTTCGTCATTCTTCG | TTCGCATTCCGGTCTCGATGT  | 401 | 59.45<br>59.83 | FISH |
|                        | Scaffold259420:93-1278    | Block 4  | ATCTGTGCCTTGACGACAGG     | AAACACGGCTCTGCTACTGT   | 561 | 60.04<br>59.61 | FISH |
|                        | Scaffold259420:2889-3469  | Block 5  | CCACCAAGATCACCAGACCTA    | GAGGGGTGTTCAAACACAGC   | 522 | 58.81<br>59.93 | FISH |
|                        | Scaffold399583:53-2099    | Block 6  | TCCCTGGAGTCATGGACTGT     | GGGATTGTCACCCTTCGTGT   | 510 | 59.88<br>59.96 | FISH |
|                        | Scaffold399583:5970-8845  | Block 7  | GAGATATCGGCTGGCGACAA     | TTCGCCGTTAATGCCAGACT   | 505 | 59.97<br>60.04 | FISH |
|                        | Scaffold401546:52-762     | Block 8  | ACGGGAAGATGGCAGATAGC     | TCCACCTCATCAACTTTCCAA  | 586 | 59.61<br>57.13 | FISH |
|                        | Scaffold623432:4237-5208  | Block 9  | AGAAGAGTCCCTGCACAACG     | GCAGACGACCCTCATCAACA   | 553 | 59.97<br>60.04 | FISH |
|                        | Scaffold723254:13-660     | Block 10 | CGCCCGTTTTTCATGCTTGT     | GGAGCAAACAACCTTACACG   | 426 | 59.71<br>59.5  | FISH |
|                        | Scaffold767652:3050-3880  | Block 11 | AGATTGTGACGCCAAGCTCA     | ACGCCTAGCACCTGGAAATC   | 558 | 59.96<br>60.11 | FISH |
|                        | Scaffold848713:4910-8047  | Block 12 | GCTCGATACGAAGCACCTGA     | GCCTCCACGTCTATGAACCC   | 540 | 59.90<br>60.18 | FISH |
|                        | Scaffold1438633:3-1038    | Block 13 | ATGCAGACTGGGTCTCAACG     | CTTGACACAGCCGCTCAAAC   | 602 | 60.04<br>60.04 | FISH |
|                        | Scaffold1632105:2434-3149 | Block 14 | GGGTGAATCCTGGTTAGACTCT   | CGAGAGGTGTGCTAAACAATGG | 528 | 58.89<br>59.58 | FISH |

Table S3. Summary of analyzed data used for microdissected Bs assemblies.

| Microdissected B/species/<br>Accession ID:                                                           | Raw<br>reads/Decontaminated<br>trimmed reads | Assembly                 | Spacer length | Fragments | Total length (bp) | % of reference genome |
|------------------------------------------------------------------------------------------------------|----------------------------------------------|--------------------------|---------------|-----------|-------------------|-----------------------|
| B1/<br>Asian Seabass fish/<br>Accession ID: SRX2041358<br>Species: <i>L. calcarifer</i>              | 876,260/78,611                               | ChB1 pseudo-scaffolds    | 10 bp         | 1,764     | 59,065            | 0.010                 |
|                                                                                                      |                                              |                          | 100 bp        | 1,743     | 603,58            | 0.010                 |
|                                                                                                      |                                              |                          | 2 kb          | 1,662     | 963,69            | 0.016                 |
|                                                                                                      |                                              |                          | 10 kb*        | 1,412     | 434,598           | 0.074                 |
|                                                                                                      |                                              |                          | 100 kb        | 1213      | 21,578,827        | 3.67                  |
| B2/B3<br>Asian Seabass fish/<br>Accession ID: SRX2041352/SRX1484569<br>Species: <i>L. calcarifer</i> | 765,254/65,780                               | ChB2-B3 pseudo-scaffolds | 10 bp         | 1,552     | 71,373            | 0.012                 |
|                                                                                                      |                                              |                          | 100 bp        | 1530      | 72,775            | 0.012                 |
|                                                                                                      |                                              |                          | 2 kb          | 1412      | 164,958           | 0.028                 |
|                                                                                                      |                                              |                          | 10 kb*        | 1,601     | 378,367           | 0.064                 |
|                                                                                                      |                                              |                          | 100 kb        | 1,097     | 16,912,139        | 2.9                   |
| B4/<br>Grasshopper/<br>Accession ID: SRX3412298<br>Species: <i>E. plorans</i>                        | 69,279,084/67,469,719                        | ChB4 pseudo-scaffolds    | 10 bp         | 5,006,153 | 5,188,127         | 0.08                  |
|                                                                                                      |                                              |                          | 100 bp        | 4,586,192 | 7,471,409         | 0.11                  |
|                                                                                                      |                                              |                          | 2 kb          | 1,460,148 | 23,634,021        | 2.3                   |
|                                                                                                      |                                              |                          | 10 kb*        | 969,779   | 25,972,513        | 2.5                   |
|                                                                                                      |                                              |                          | 100 kb        | 725,481   | 383,082,448       | 38.3                  |
| B5/ Mouse/Accession ID: SRX3412297<br>Species: <i>Apodemus peninsulae</i>                            | 938,990/660,346                              | ChB5 pseudo-scaffolds    | 10 bp         | 94        | 14,095            | -                     |
|                                                                                                      |                                              |                          | 100 bp        | 93        | 14,127            | -                     |

|                                     |                |                       |        |     |            |   |
|-------------------------------------|----------------|-----------------------|--------|-----|------------|---|
|                                     |                |                       | 2 kb   | 84  | 19,715     | - |
|                                     |                |                       | 10 kb* | 82  | 29,798     | - |
|                                     |                |                       | 100 kb | 64  | 800,520    | - |
| B6/ Mouse/Acession ID: SRX3412293   | 2630300/113844 | ChB5 pseudo-scaffolds | 10 bp  | 40  | 6,183      | - |
| Species: <i>Apodemus peninsulae</i> |                |                       | 100 bp | 40  | 6,183      | - |
|                                     |                |                       | 2 kb   | 40  | 6,183      | - |
|                                     |                |                       | 10 kb* | 39  | 10,445     | - |
|                                     |                |                       | 100 kb | 36  | 132,972    | - |
| B7/ Mouse/Acession ID:SRX3412299    | 1590728/783058 | ChB7 pseudo-scaffolds | 10 bp  | 901 | 70,503     | - |
| Species: <i>A. flavicollis</i>      |                |                       | 100 bp | 889 | 71,210     | - |
|                                     |                |                       | 2 kb   | 854 | 92,874     | - |
|                                     |                |                       | 10 kb* | 773 | 457,733    | - |
|                                     |                |                       | 100 kb | 375 | 18,833,514 | - |

10 kb\* was considered for annotation and gene ontologies

Table S4. List of 10 common functions shared among the Bs of all seven analyzed species

| <b>GO IDs</b> | <b>GO term</b>                 | <b>Definition</b>                                                                                                                                                                                                                                                                                                                                      |
|---------------|--------------------------------|--------------------------------------------------------------------------------------------------------------------------------------------------------------------------------------------------------------------------------------------------------------------------------------------------------------------------------------------------------|
| GO:0016740    | Transferase activity           | Catalysis of the transfer of a group, e.g. a methyl group, glycosyl group, acyl group, phosphorus-containing, or other groups, from one compound (generally regarded as the donor) to another compound (generally regarded as the acceptor). Transferase is the systematic name for any enzyme of EC class 2.                                          |
| GO:0016021    | Integral component of membrane | The component of a membrane consisting of the gene products and protein complexes having at least some part of their peptide sequence embedded in the hydrophobic region of the membrane.                                                                                                                                                              |
| GO:0016787    | Hydrolase activity             | Catalysis of the hydrolysis of various bonds, e.g. C-O, C-N, C-C, phosphoric anhydride bonds, etc. Hydrolase is the systematic name for any enzyme of EC class 3.                                                                                                                                                                                      |
| GO:0005634    | Nucleus                        | A membrane-bounded organelle of eukaryotic cells in which chromosomes are housed and replicated. In most cells, the nucleus contains all of the cell's chromosomes except the organellar chromosomes, and is the site of RNA synthesis and processing. In some species, or in specialized cell types, RNA metabolism or DNA replication may be absent. |
| GO:0008270    | Zinc ion binding               | Interacting selectively and non-covalently with zinc (Zn) ions.                                                                                                                                                                                                                                                                                        |
| GO:0005524    | ATP binding                    | Interacting selectively and non-covalently with ATP, adenosine 5'-triphosphate, a universally important coenzyme and enzyme regulator.                                                                                                                                                                                                                 |
| GO:0000166    | Nucleotide binding             | Interacting selectively and non-covalently with a nucleotide, any compound consisting of a nucleoside that is esterified with (ortho)phosphate or an oligophosphate at any hydroxyl group on the ribose or deoxyribose.                                                                                                                                |
| GO:0005515    | Protein binding                | Interacting selectively and non-covalently with any protein or protein complex (a complex of two or more proteins that may include other nonprotein molecules).                                                                                                                                                                                        |
| GO:0016020    | Membrane                       | A lipid bilayer along with all the proteins and protein complexes embedded in it an attached to it.                                                                                                                                                                                                                                                    |
| GO:0046872    | Metal ion binding              | Interacting selectively and non-covalently with any metal ion.                                                                                                                                                                                                                                                                                         |
