# Supplementary material for: B chromosomes of multiple species have intense evolutionary dynamics and accumulated genes related to important biological processes
Source: PubMed Central journal article supplement (PMC7509943; doi:10.1186/s12864-020-07072-1), 2020-09-23
Supplement: 12864_2020_7072_MOESM3_ESM.pdf [file 12864_2020_7072_MOESM3_ESM.pdf]

## Supplementary Figures

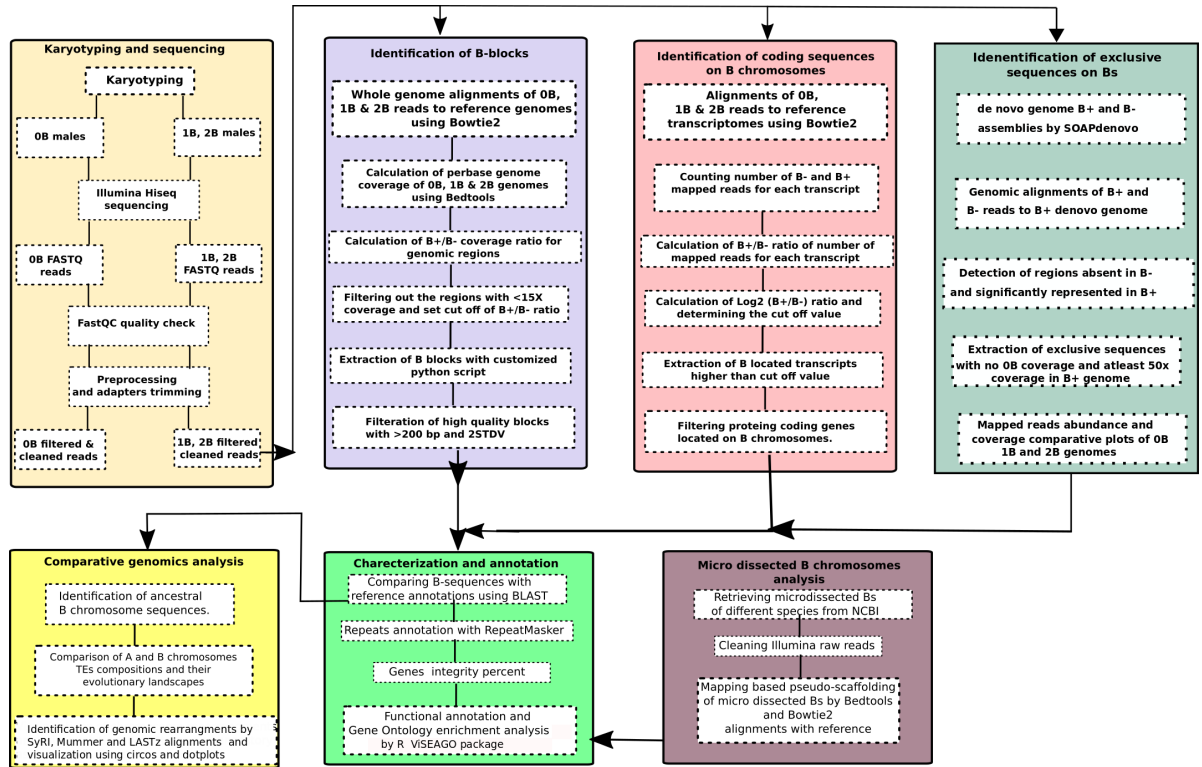

**Fig. S1.** A workflow of steps applied in the present study during the procedure of genomics analyses of B chromosomes in different species.

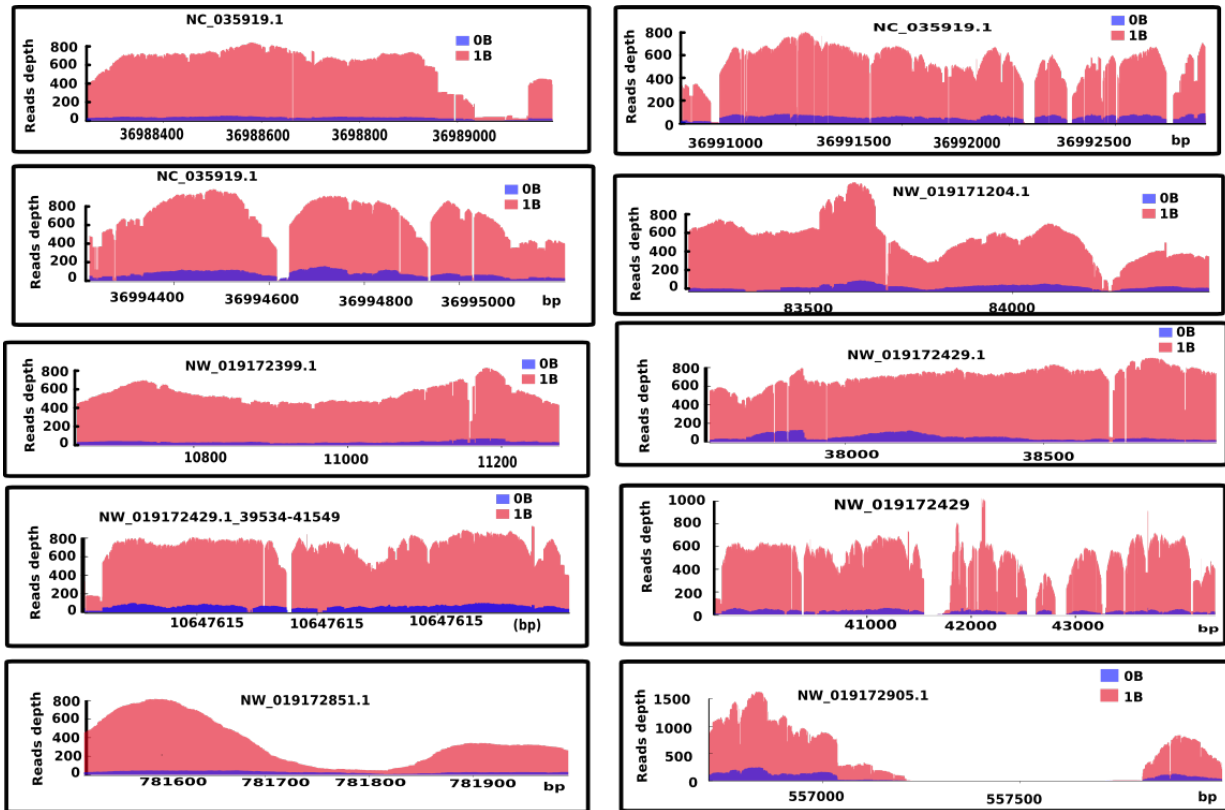

**Fig. S2.** Coverage plots of B-blocks of *A. correntinus* with remarkable difference in the reads coverage between 0B and 1B samples.

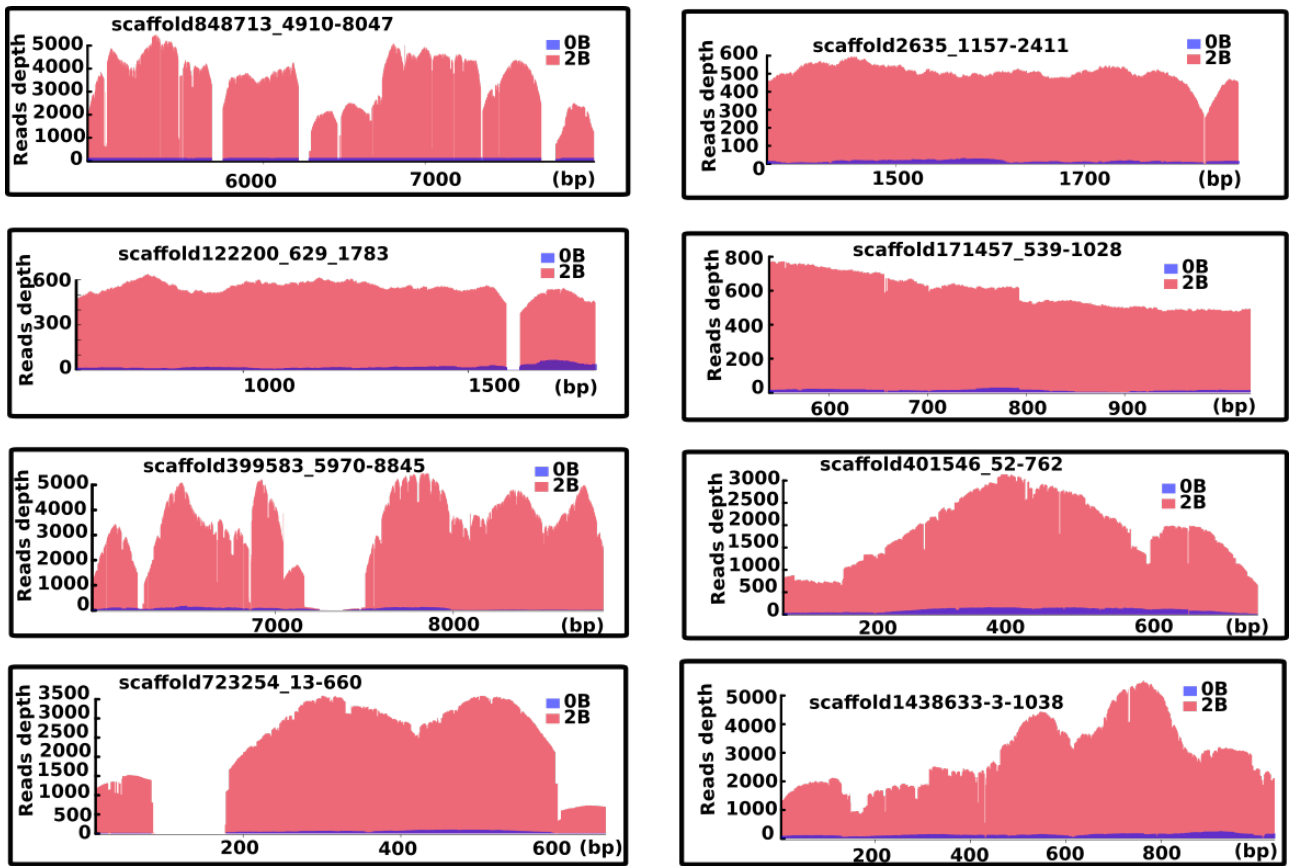

**Fig. S3.** Coverage plots of B-blocks of *A. flavolineata* with remarkable difference in the reads coverage between 0B and 2B samples.

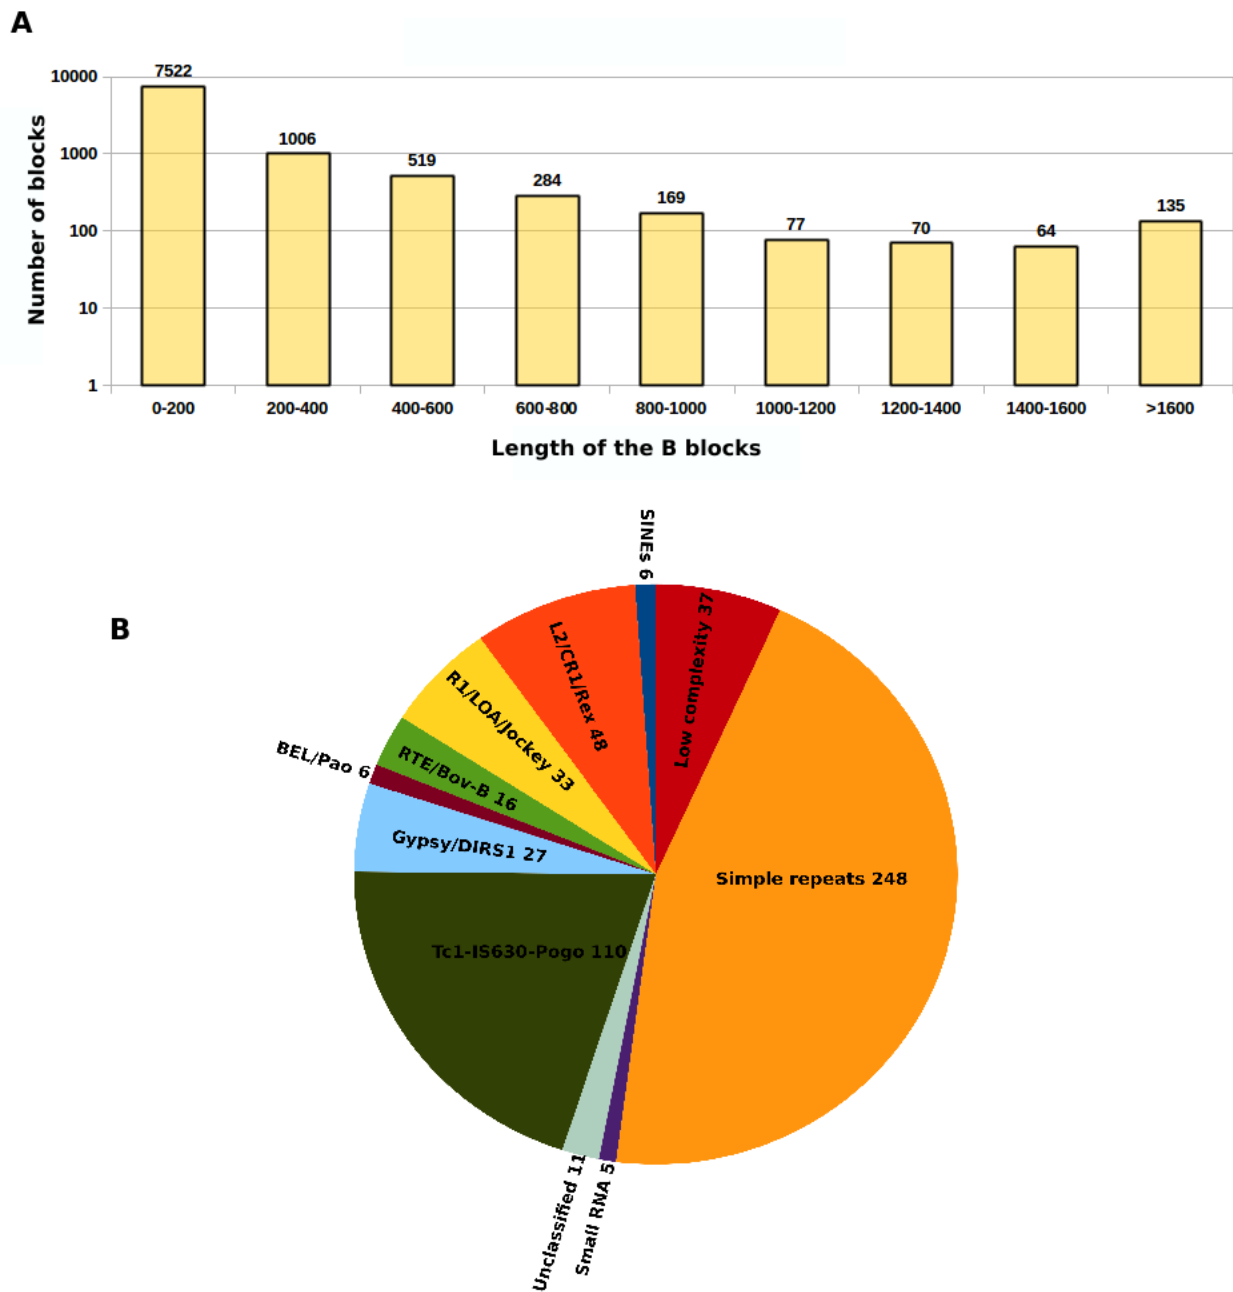

**Fig. S4.** Identification of B chromosome genomic blocks (A) and their repeats contents (B) in *A. flavolineata*.

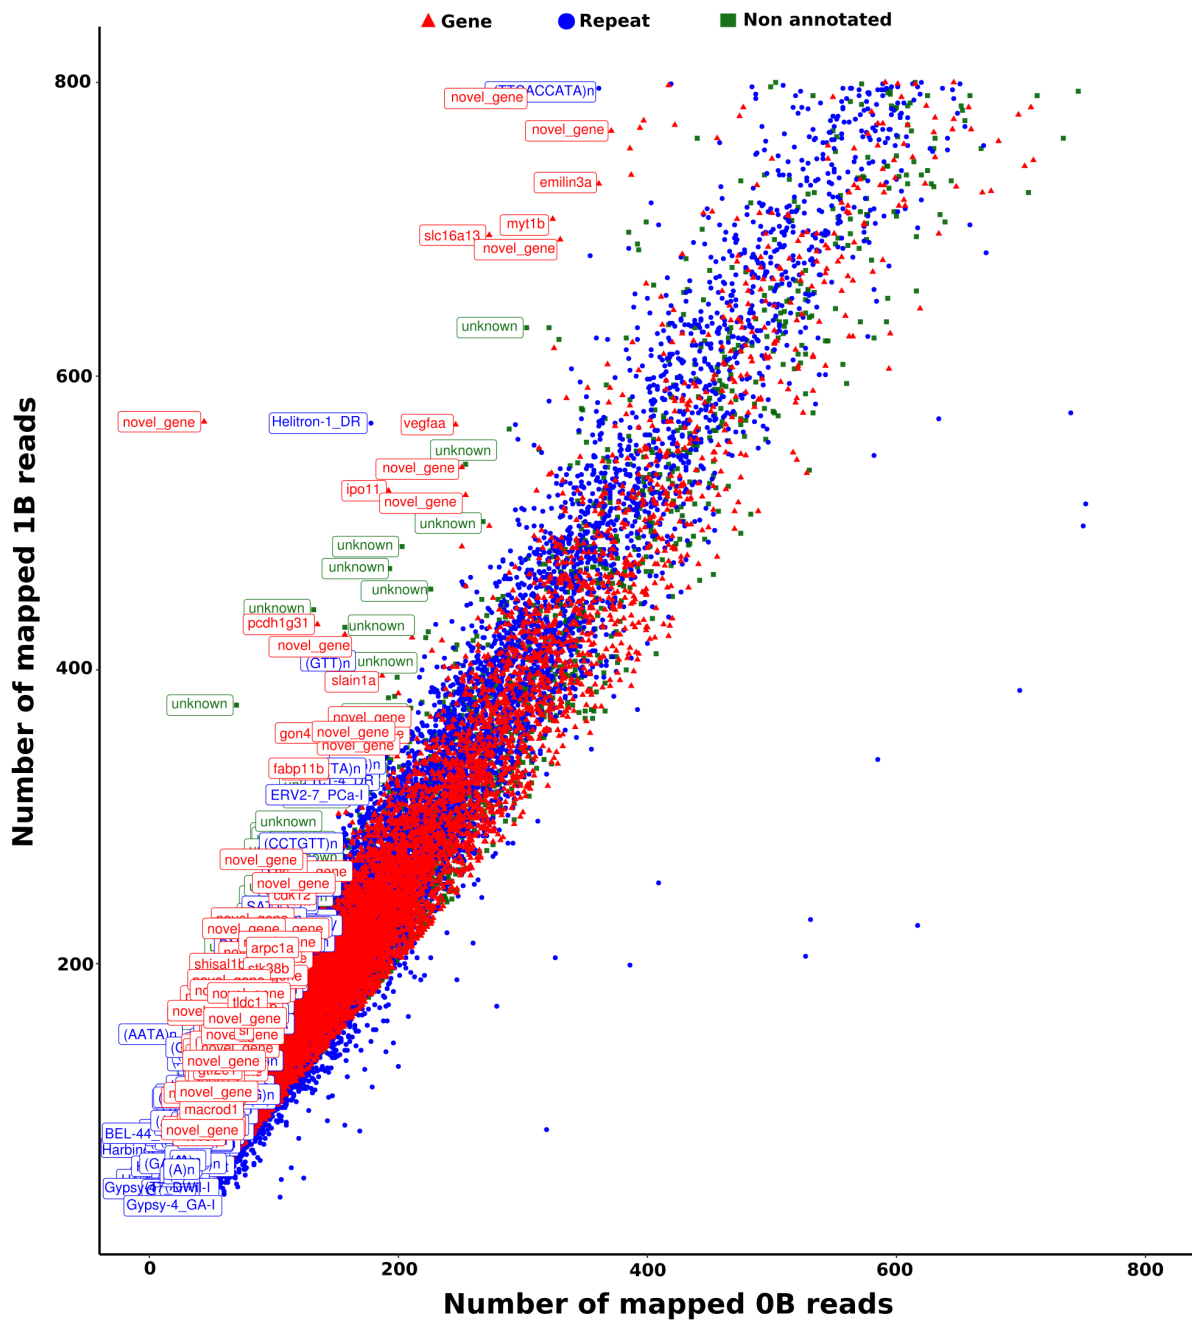

**Fig. S5.** Identification of protein-coding genes located in B chromosomes of the *A. mexicanus*, using the number of mapped reads that map to the CDSs found in the transcriptome, in the 0B (X axis) and 2B (Y axis). Each dot represents a coding sequence with only those labeled that recorded the  $\log_2$  greater than 1.5. The plot is limited for 800 mapped reads to optimize the visualizations.



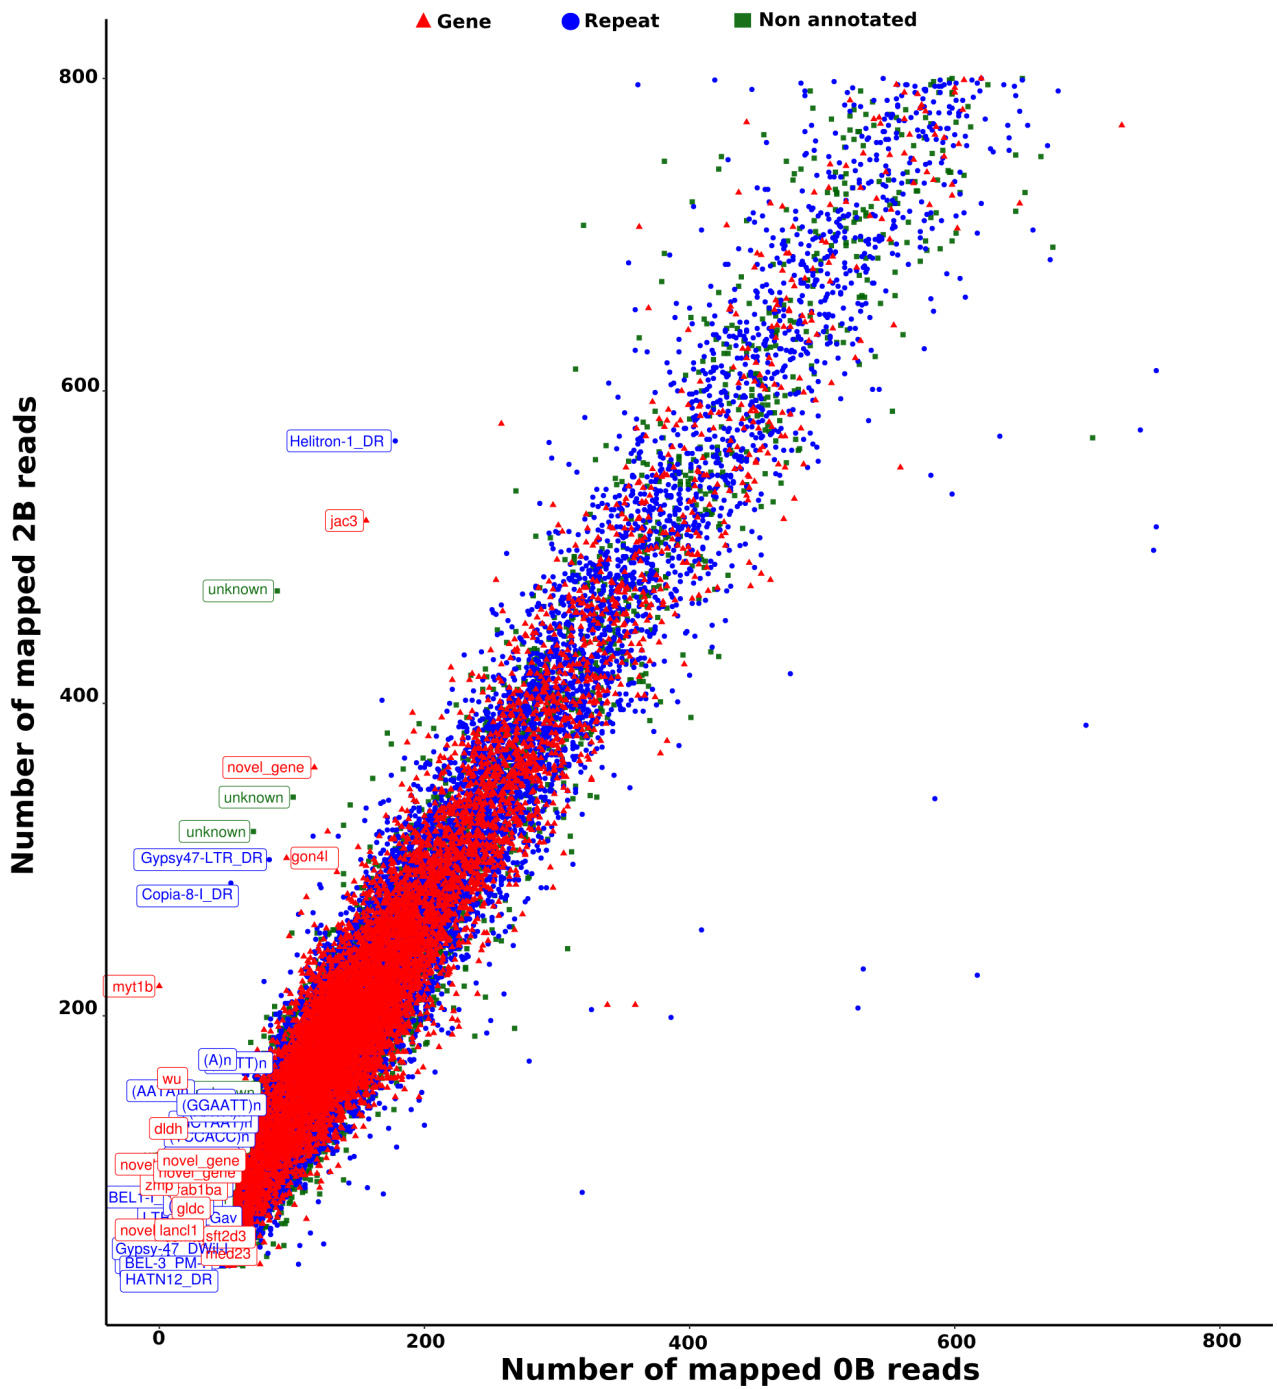

**Fig. S6.** Identification of protein-coding genes located in B chromosomes of the *A. correntinus*, using the number of mapped reads that map to the CDSs found in the transcriptome, in the 0B (X axis) and 1B (Y axis). Each dot represents a coding sequence with only those labeled that recorded the  $\log_2$  greater than 1. The plot is limited for 800 mapped reads to optimize the visualizations.

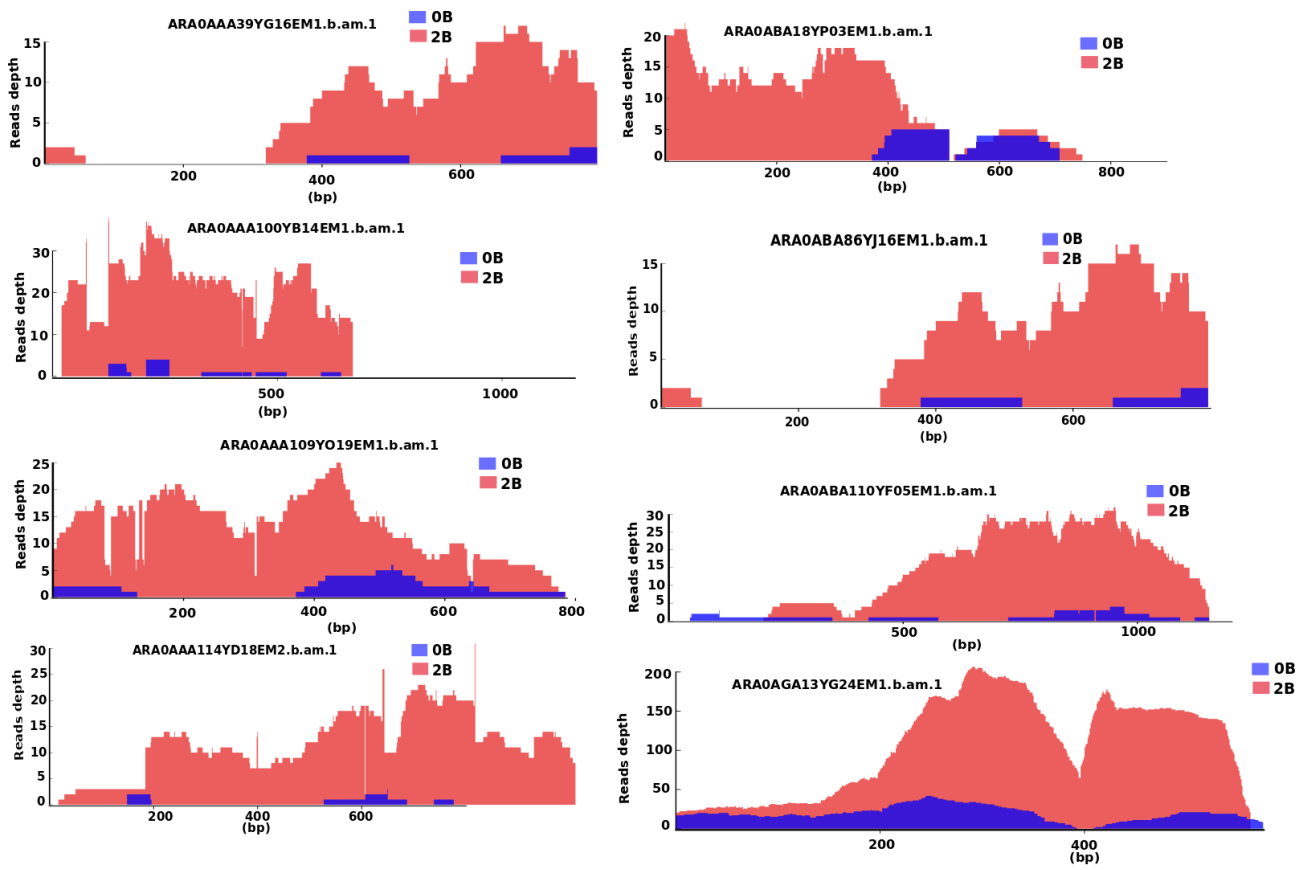

**Fig. S7.** Coverage plots of (representative) coding sequences detected on the B chromosome of *A. mexicanus* using Log base 2 ratio. Each plot compares the reads depth of the transcript between 0B and 2B.

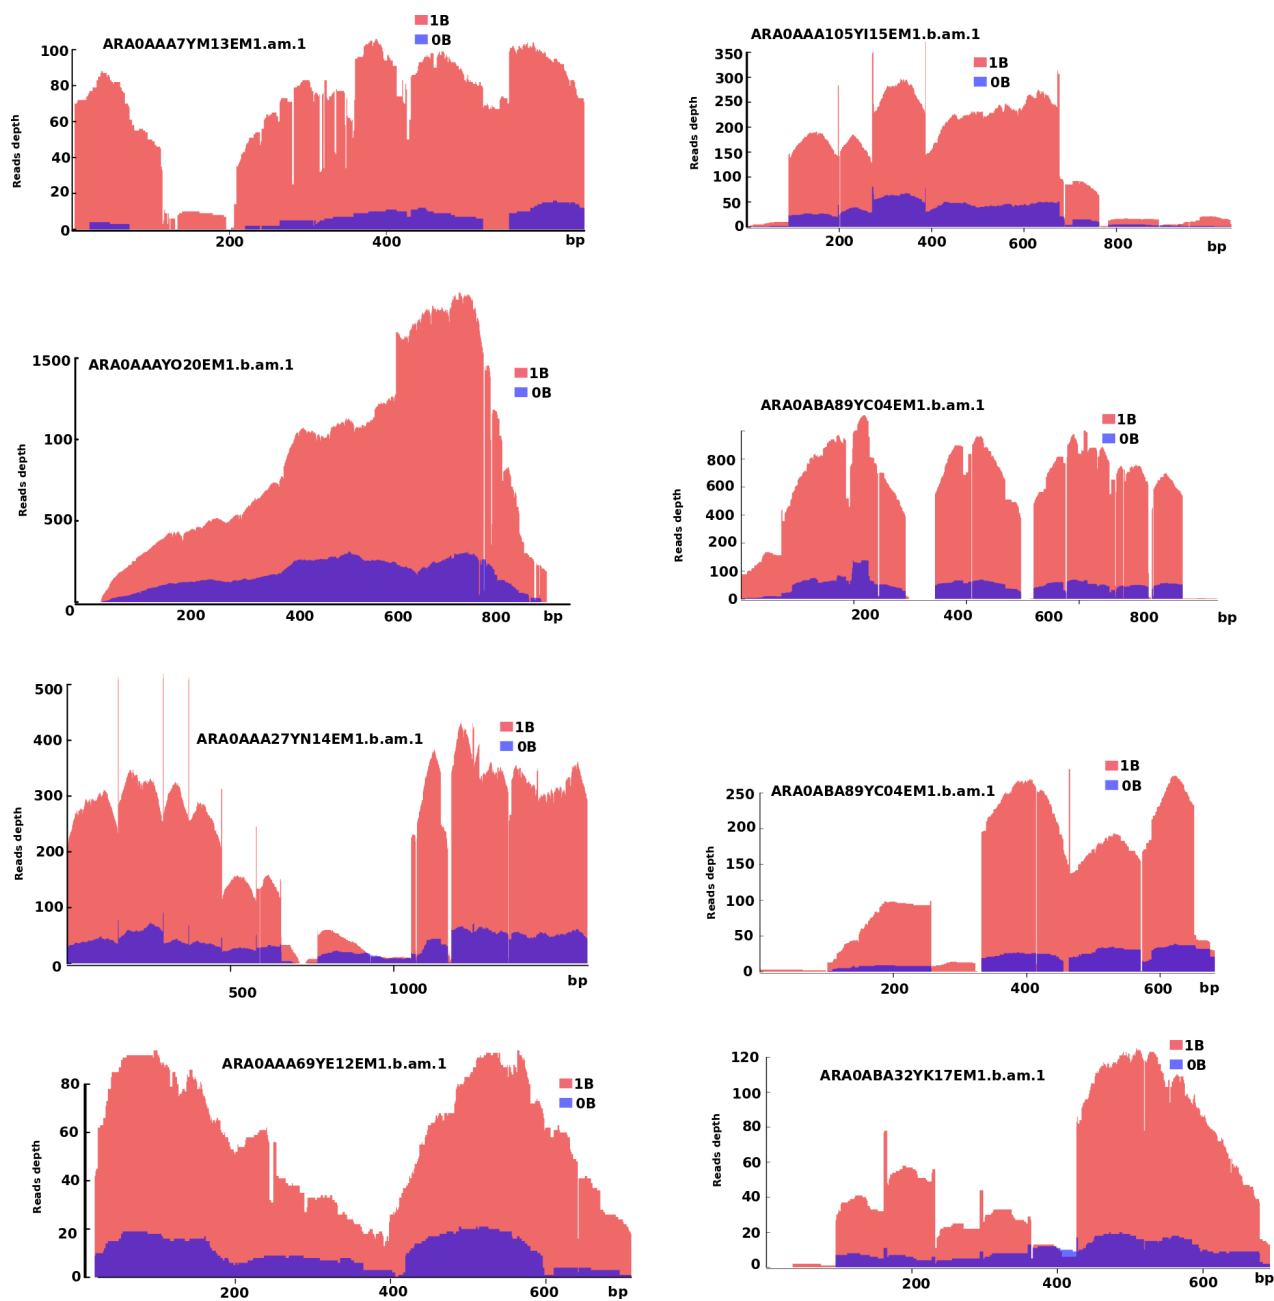

**Fig. S8.** Coverage plots of (representative) coding sequences detected on the B chromosome of *A. correntinus* using Log base 2 ratio. Each plot compares the reads depth of the transcript between 0B and 1B.

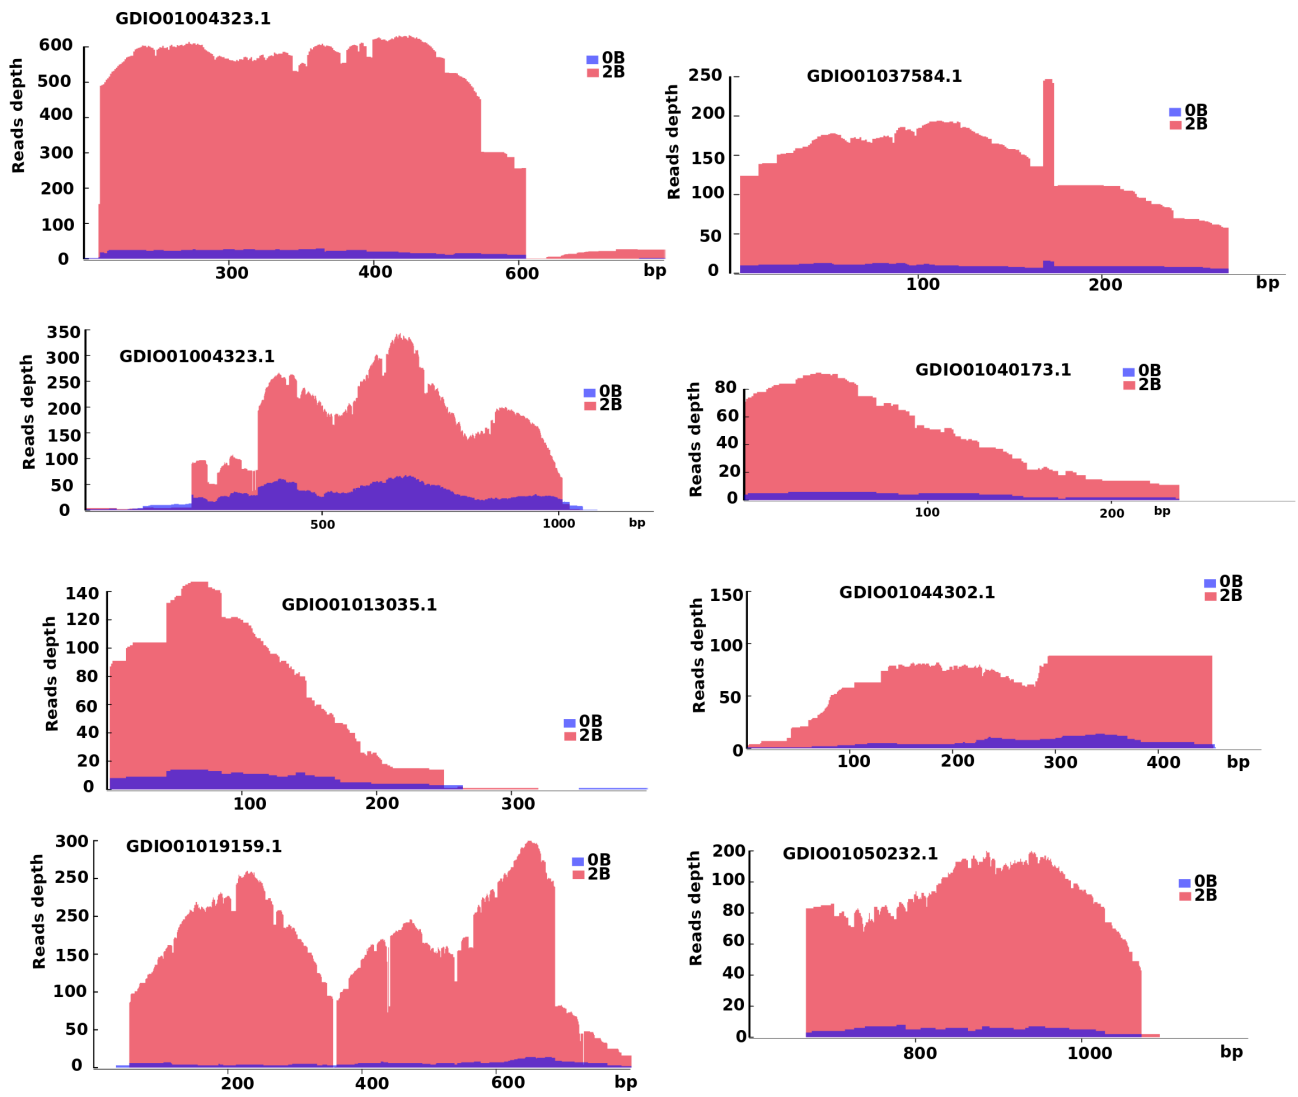

**Fig. S9.** Coverage plots of (representative) coding sequences detected on the B chromosome of *A. flavolineata* using Log base 2 ratio. Each plot compares the reads depth of the transcripts between OB and 2B.

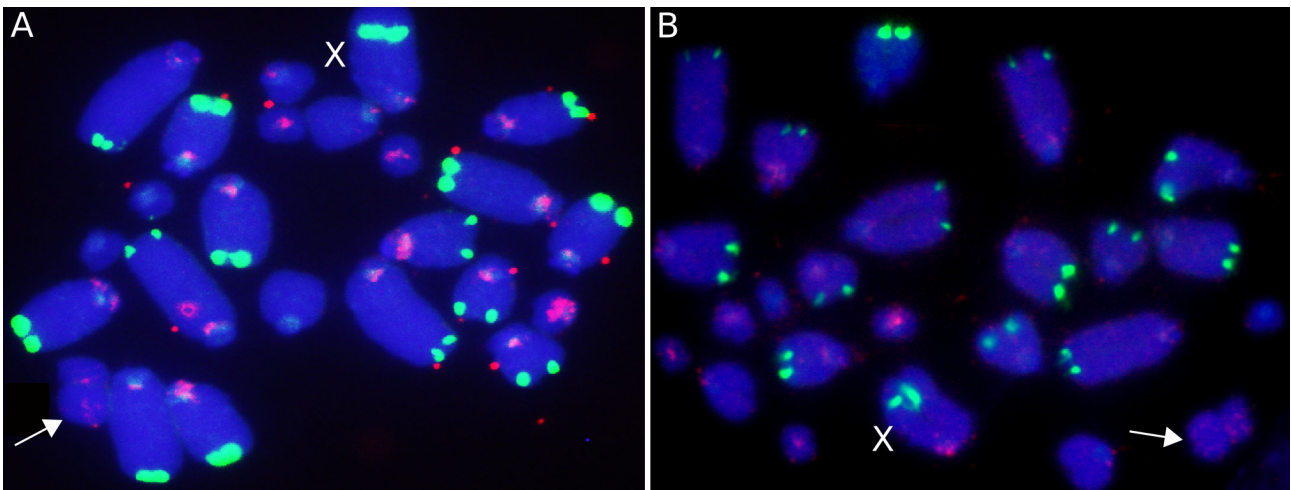

**Fig. S10.** Double FISH mapping of candidate blocks in *A. flavolineata*. Each panel represents mapping of two distinct blocks (7 and 14 – See Supplementary Table S2) labeled with digoxigenin (block 7 in red) and biotin (block 14 in green). A scattered pattern of markings of block 7 can be observed for the B chromosomes (white arrows), whereas telomeric and centromeric associated signals of blocks 7 and 14 are obvious for different A and X chromosomes.

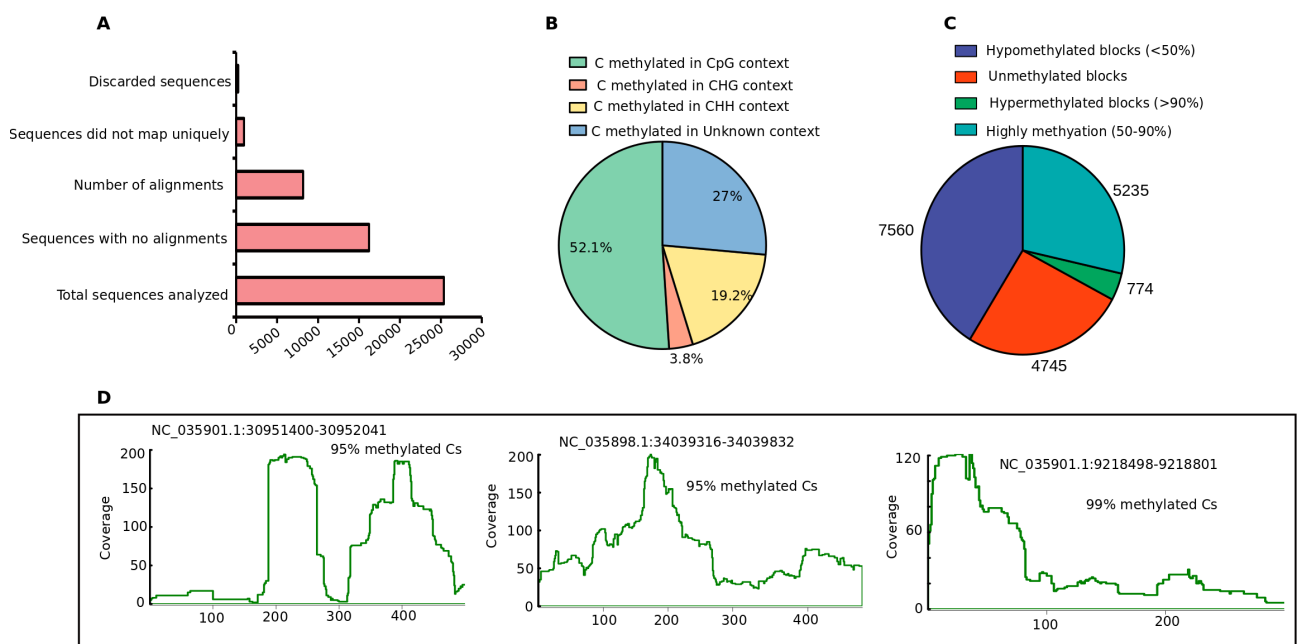

**Fig. S11.** The methylation profile of microB blocks in *A. mexicanus*. **(A)** Graph shows the number of Bisulphite reads analyzed with B blocks and alignments. **(B)** Pie chart represents percentage of B block methylated Cs in different contexts with the highest percent in CpGs regions. **(C)** Pie chart highlights the number of hypomethylated (less than 50% methylated Cs), unmethylated, highly methylated and hypermethylated (more than 90% methylated Cs) B chromosome blocks. **(D)** Bisulphite coverage plots of hypermethylated blocks are shown as examples. Refer to Supplementary datasets (excel) for a complete list of methylated blocks with methylation level.

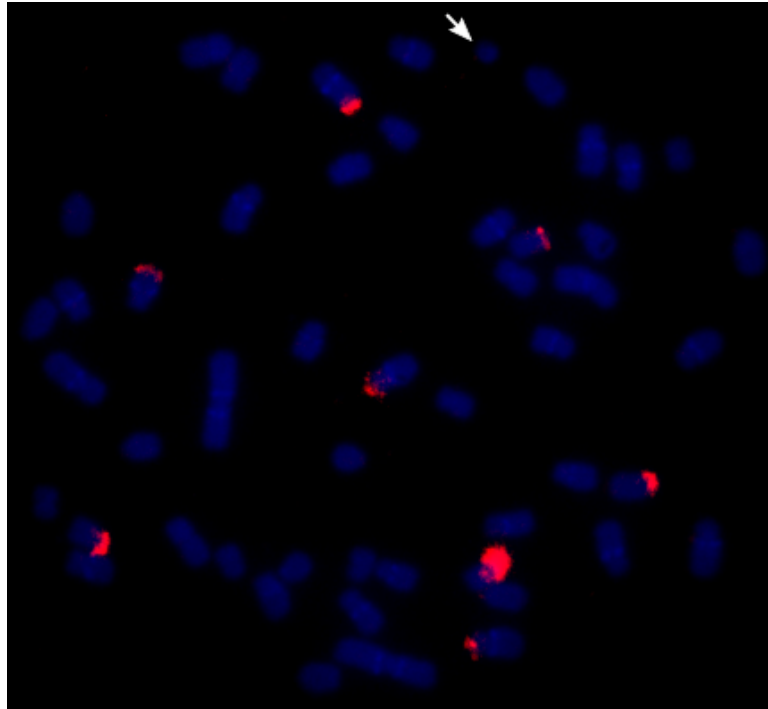

**Fig. S12.** FISH mapping of 45S rDNA (red labeling) in *A. mexicanus*. The micro B is indicated with an arrow showing no sign of 45S rDNA.

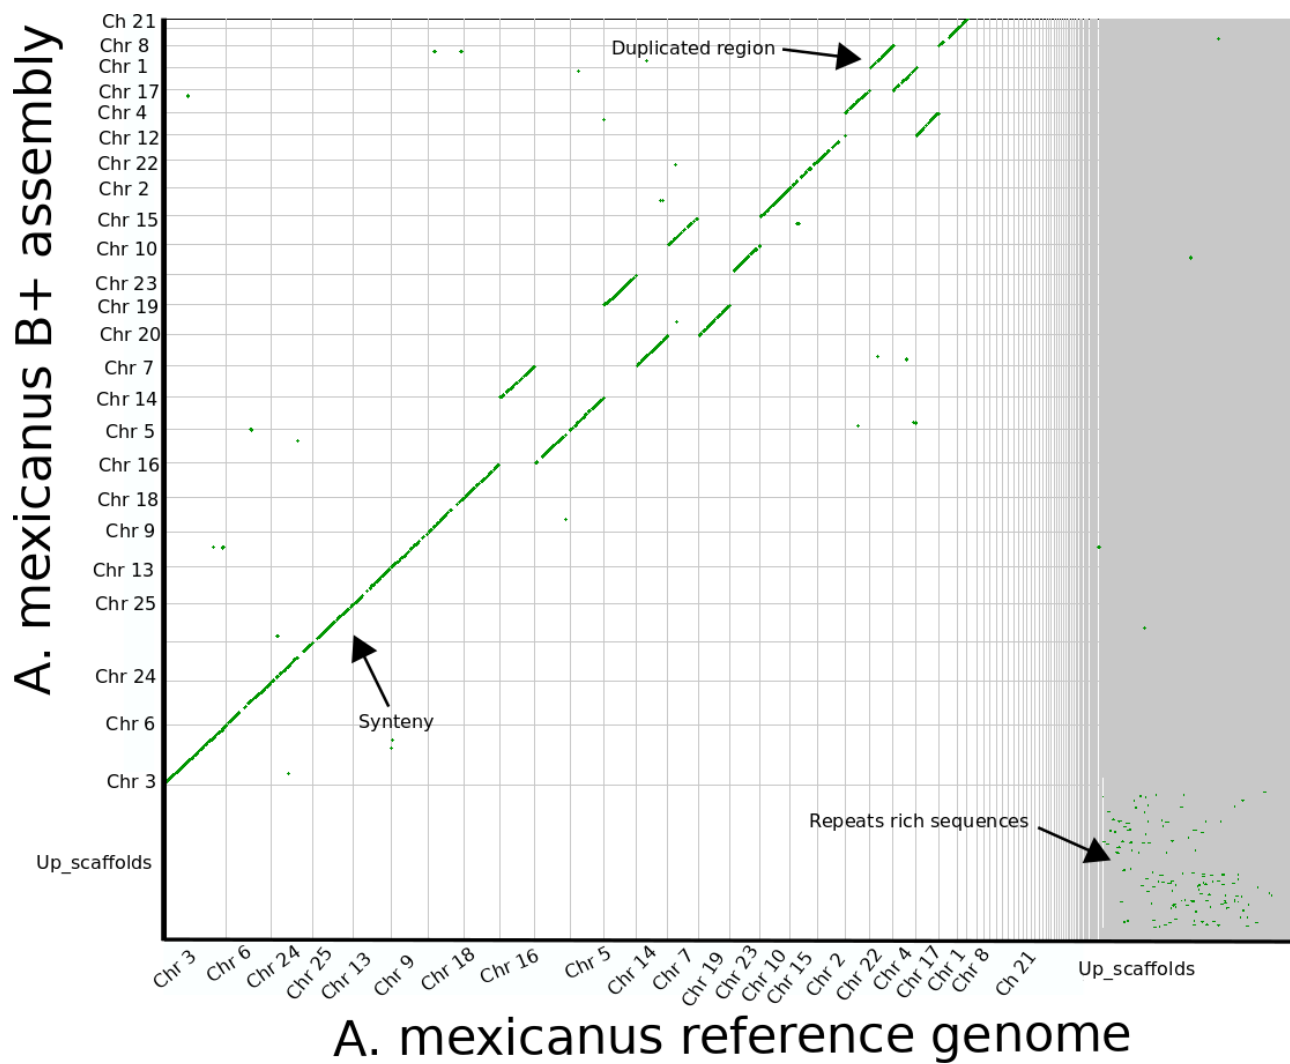

**Fig. S13.** Synteny dotplot of whole genome alignments between de novo B+ assembly and reference masked (coding) genome of *A. mexicanus*.

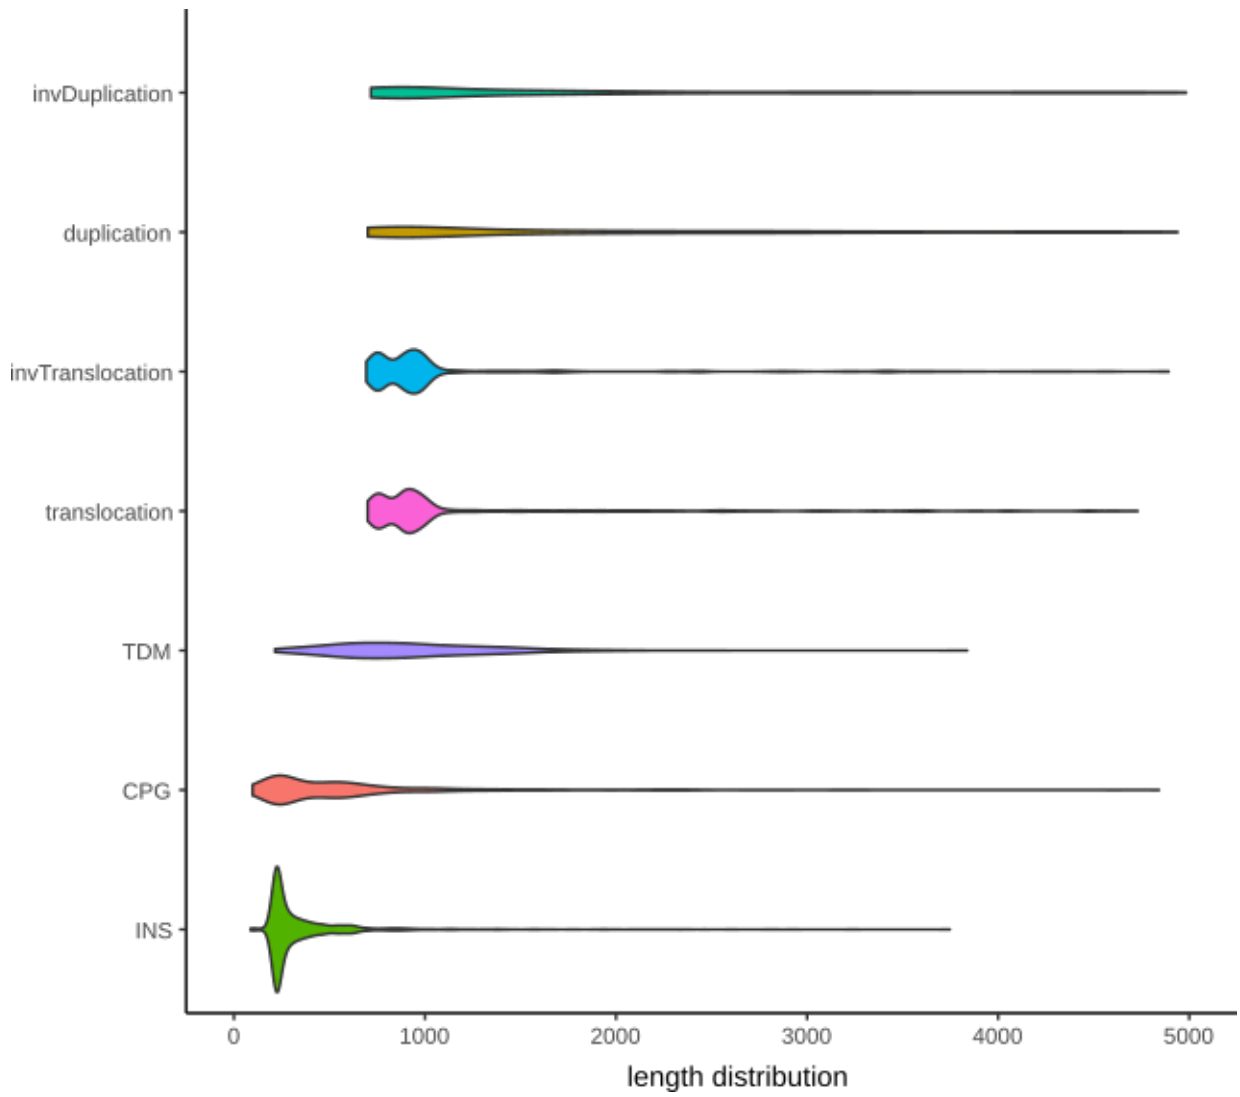

**Fig. S14.** Violin plots show the distribution of length for various types of genomic rearrangements from 0-5000 bp range.



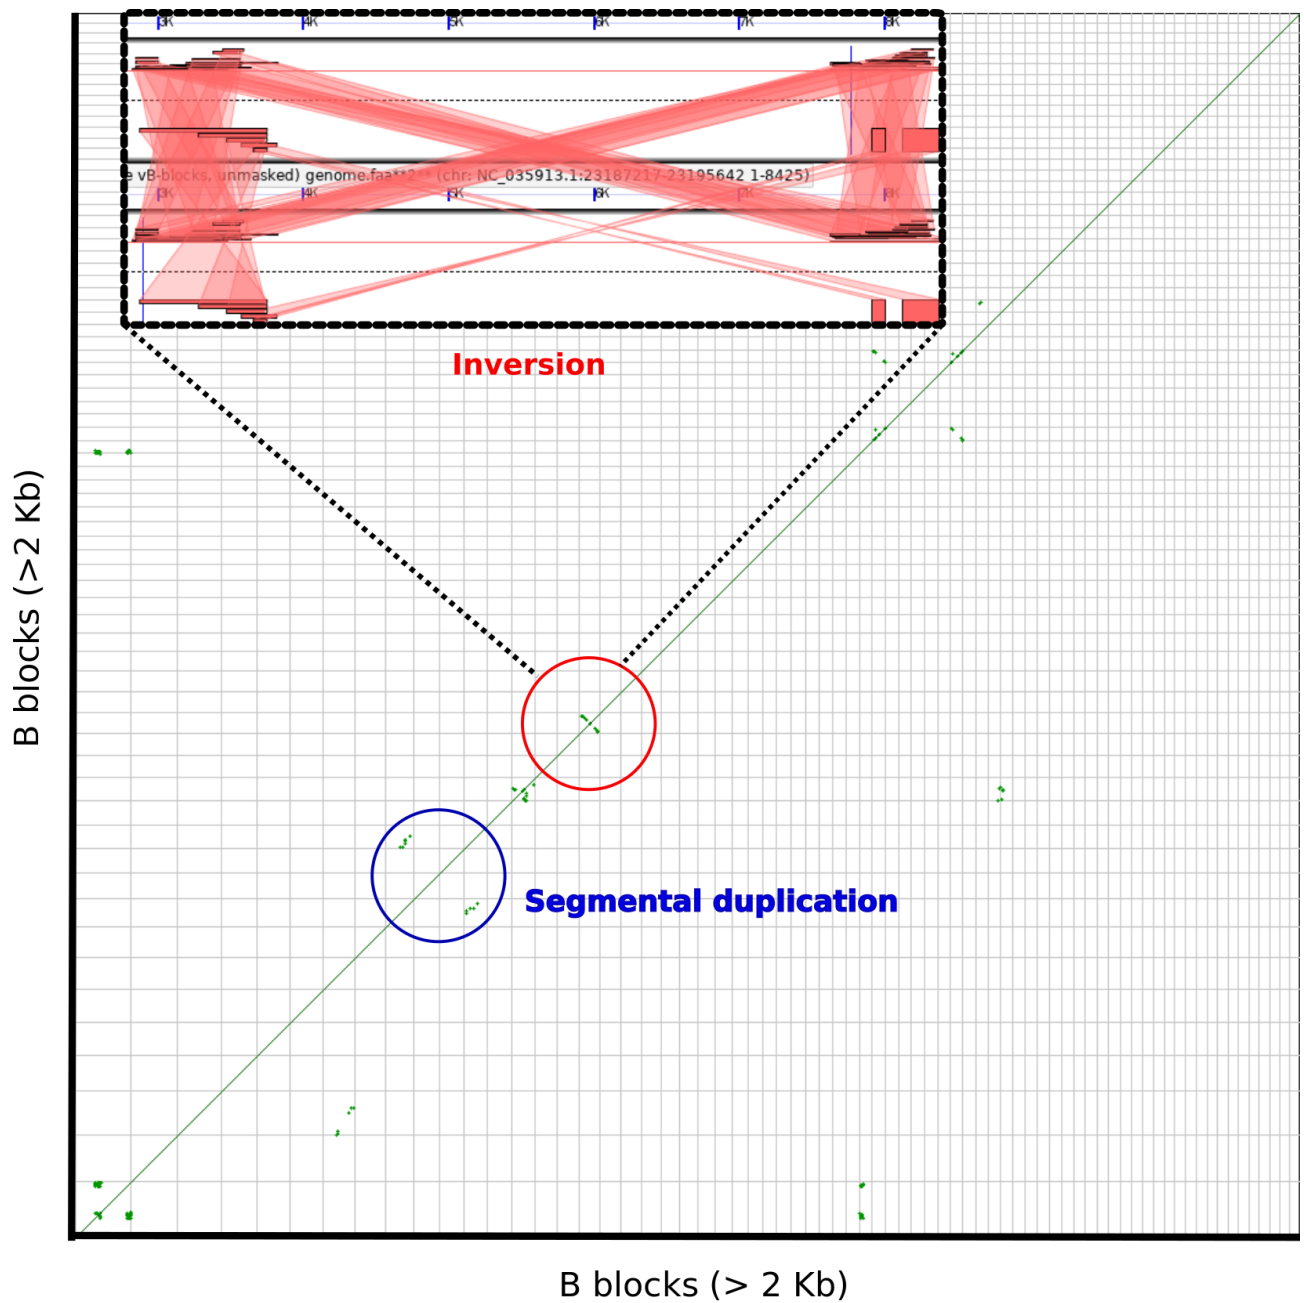

**Fig. S15.** Synteny dotplot (synmap version, unfiltered) of self alignments of B blocks (*A. mexicanus*).

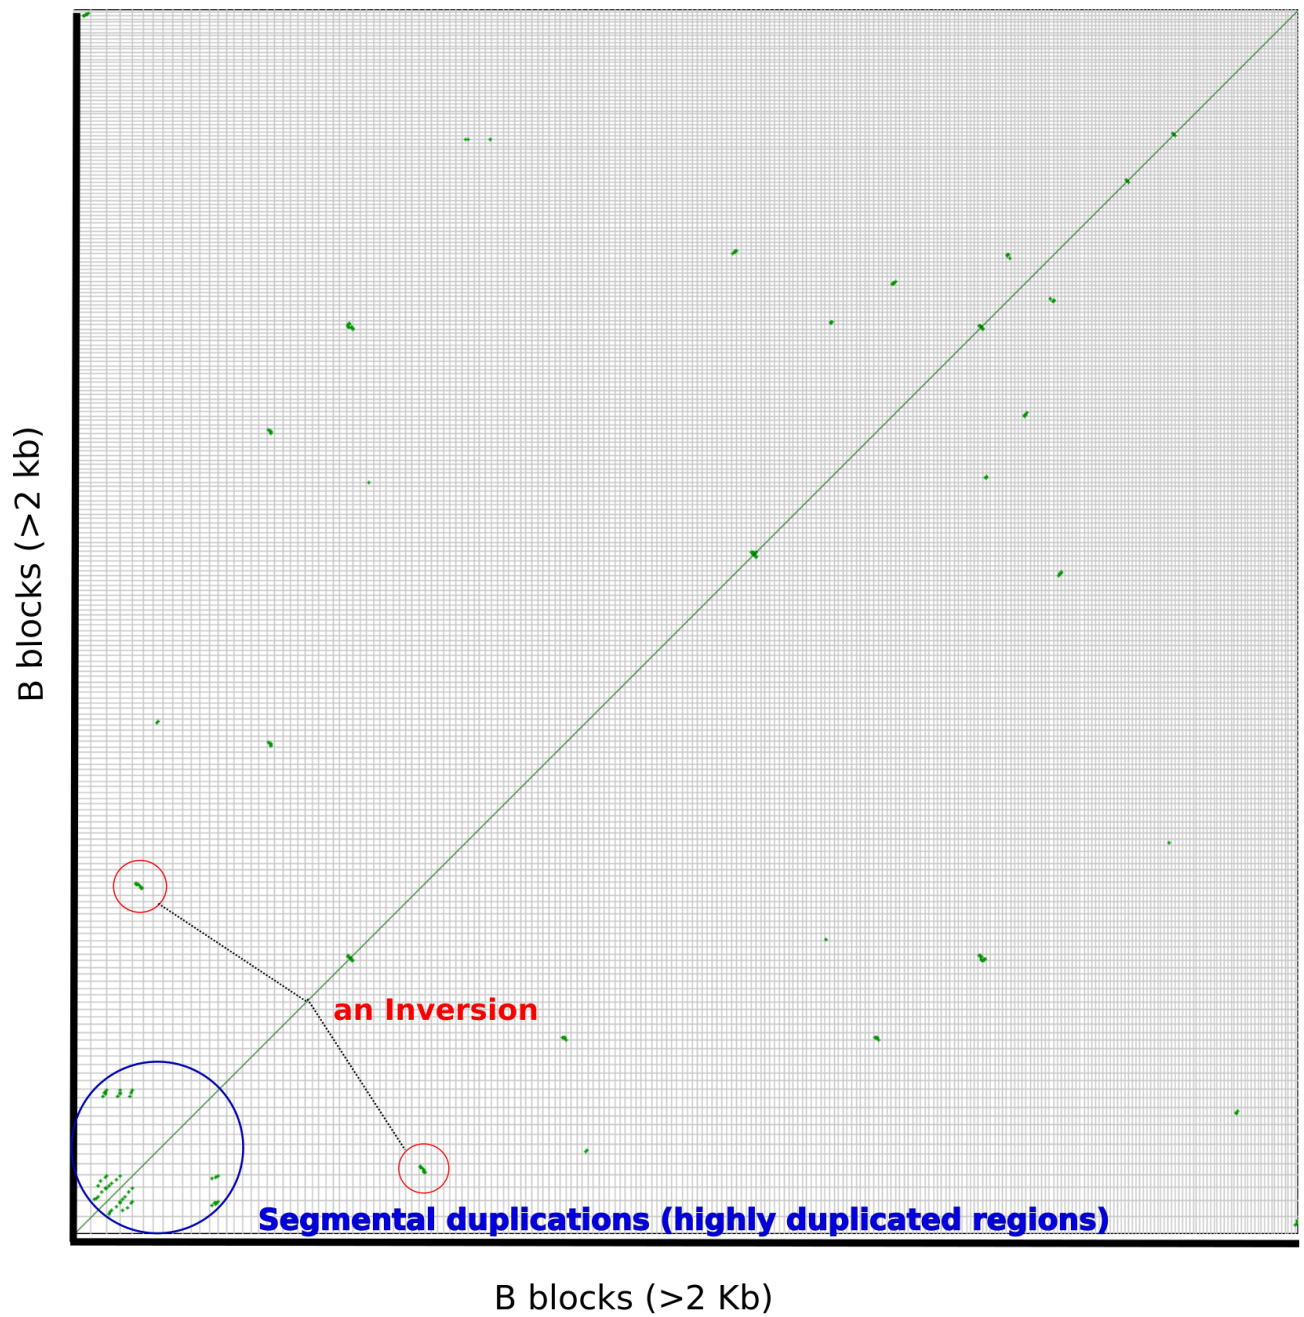

**Fig. S16.** Synteny dotplot (synmap version, unfiltered) of self alignments of B blocks (*A. correntinus*).

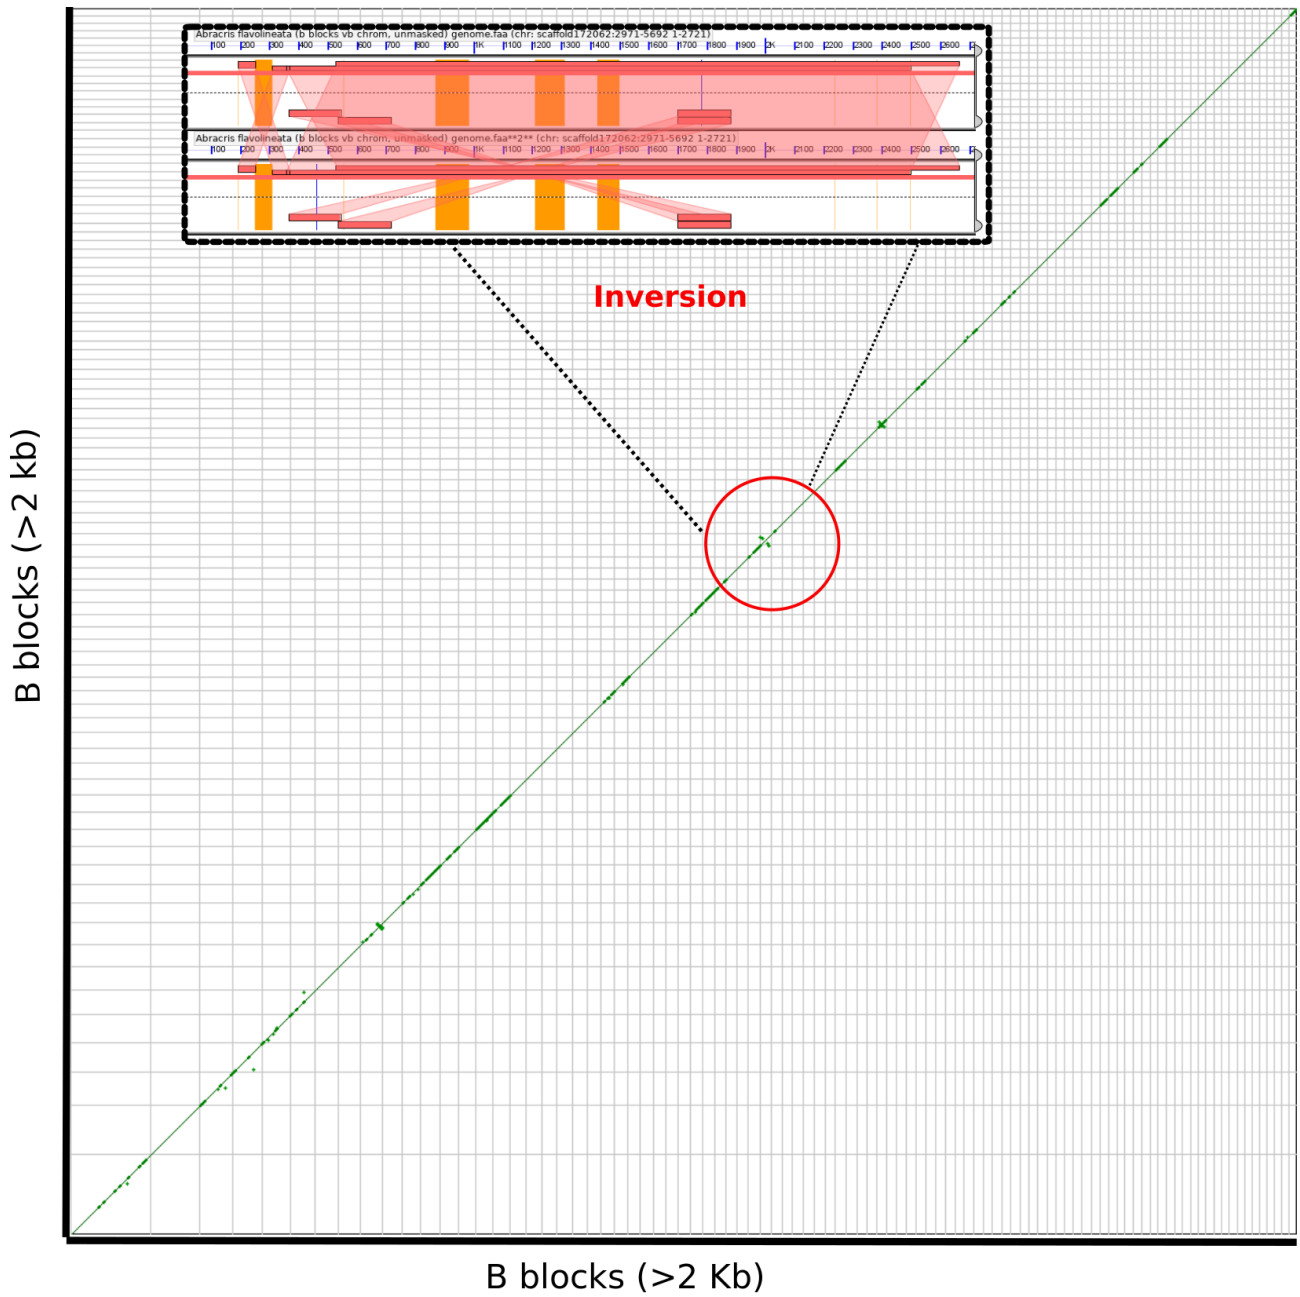

**Fig. S17.** Synteny dotplot (synmap version, unfiltered) of self-alignments of B blocks (*A. flavolineata*).
